# Supplementary material for: Dual HER2 Blockade versus a Single Agent in Trastuzumab-Containing Regimens for HER2-Positive Early Breast Cancer: A Systematic Review and Meta-Analysis of Randomized Controlled Trials
Source: J Oncol. 2020 Mar 16;2020:5169278. doi: 10.1155/2020/5169278 (PMC7102417; doi:10.1155/2020/5169278)
Supplement: Supplementary Materials — Additional file 1: Appendix 1: definitions of outcomes. Appendix 2: characteristics of included studies. Appendix 3: risk of bias assessment. Additional file 2: Figure S1: forest plots for all outcomes. Figure S2: sensitivity analyses. Figure S3: publication bias. [file 5169278.f1.zip]

Archive with 2 entries (2 files):
- 5169278.f1/Additional file 1.doc
- 5169278.f1/Additional file 2.doc
